# Supplementary material for: Kinetic competition during the transcription cycle results in stochastic RNA processing
Source: eLife journal article supplement (doi:10.7554/elife.03939), 2014-10-01

**Two independent genes**

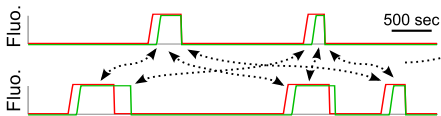

**Equivalent to 1 gene with 2x initiation rate**

Total fluo.

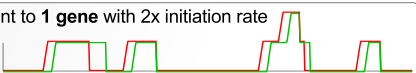

**Inter-gene correlations**  
distribute uniformly  
and average out.

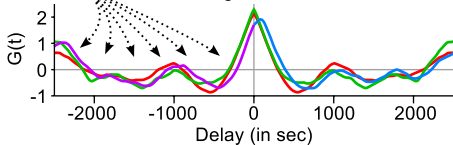

Supplement: supp [file elife-03939-supp-v1.zip]
