# Supplementary material for: Kinetic competition during the transcription cycle results in stochastic RNA processing
Source: eLife journal article supplement (doi:10.7554/elife.03939), 2014-10-01
Supplement: supp [file elife-03939-supp-v1.zip]

Archive with 21 entries (21 files):
- elife_poa_e03939_Video_4.mov
- elife_poa_e03939_Figure_4_Supplement_1.pdf
- elife_poa_e03939_Video_2.mpg
- elife_poa_e03939_Figure_2_Supplement_6.pdf
- elife_poa_e03939_Figure_1_Supplement_1.pdf
- elife_poa_e03939_Figure_2_Supplement_5.pdf
- elife_poa_e03939_Video_7.mov
- elife_poa_e03939_Video_5.avi
- elife_poa_e03939_Figure_1_Supplement_2.pdf
- elife_poa_e03939_Figure_2_Supplement_1.pdf
- elife_poa_e03939_Supplementary_File_1.pdf
- elife_poa_e03939_Video_6.avi
- elife_poa_e03939_Supplementary_File_2.xlsx
- elife_poa_e03939_Figure_2_Supplement_2.pdf
- elife_poa_e03939_Source_Code.zip
- elife_poa_e03939_Video_3.avi
- elife_poa_e03939_Figure_3_Supplement_1.pdf
- elife_poa_e03939_Figure_2_Supplement_3.pdf
- elife_poa_e03939_Figure_4_Supplement_2.pdf
- elife_poa_e03939_Video_1.mov
- elife_poa_e03939_Figure_2_Supplement_4.pdf
