# Supplementary material for: Kinetic competition during the transcription cycle results in stochastic RNA processing
Source: eLife journal article supplement (doi:10.7554/elife.03939), 2014-10-01
Supplement: supp [file elife-03939-supp-v1.zip]

### Scheme I

All splicing is post-release

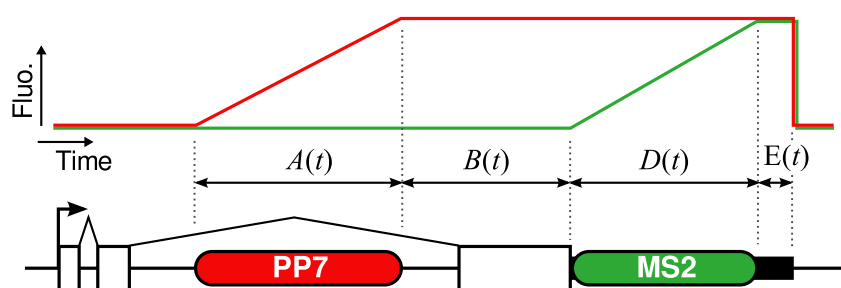

Causality relationships  
(after RNAP passed 3'ss)

~~Splicing~~

Elongation → Release

### Scheme II

Splicing & transcription/release are independent

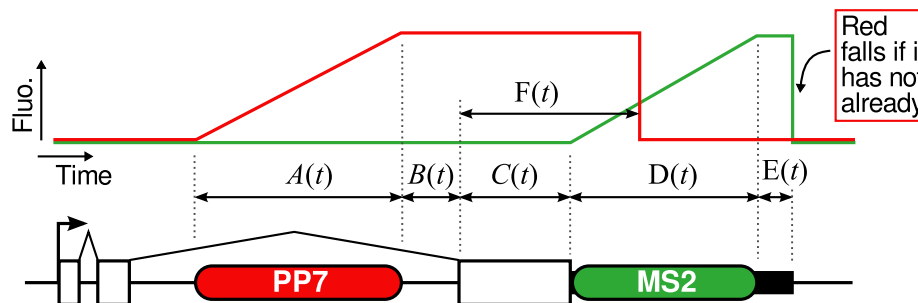

Splicing

-----  
Elongation → Release

### Scheme III

Elongation pauses at 3'ss until intron is spliced

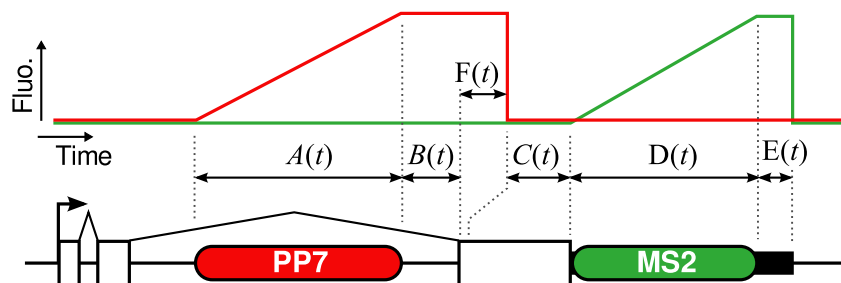

Splicing

↙  
Elongation → Release

### Scheme IV

Splicing happens after exon 3' end/poly(A) site is reached

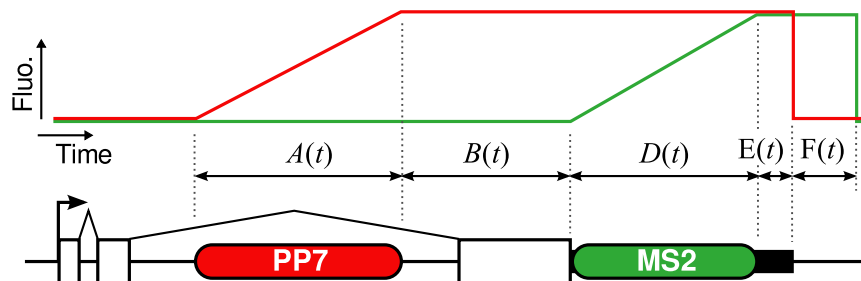

Splicing

↗  
Elongation → Release

### Scheme V

Transcript is retained at the 3' end until spliced

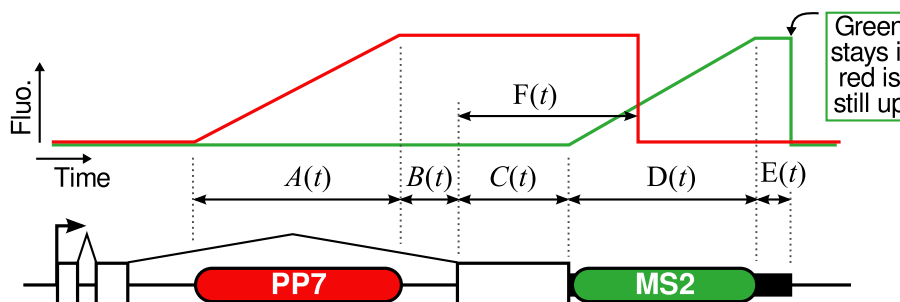

Splicing

-----  
Elongation → Release

→ : Kinetic constraint  
----- : Kinetic independence

No checkpoint

Checkpoints
