# Supplementary material for: Kinetic competition during the transcription cycle results in stochastic RNA processing
Source: eLife journal article supplement (doi:10.7554/elife.03939), 2014-10-01

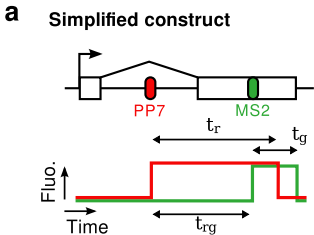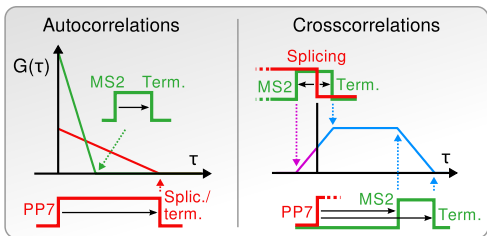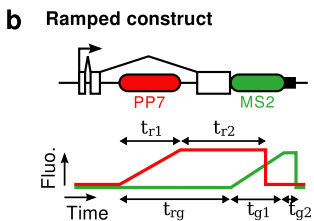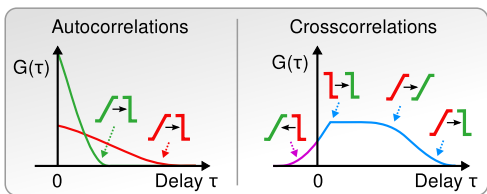

**c Deterministic kinetics  
(with simplified construct)**

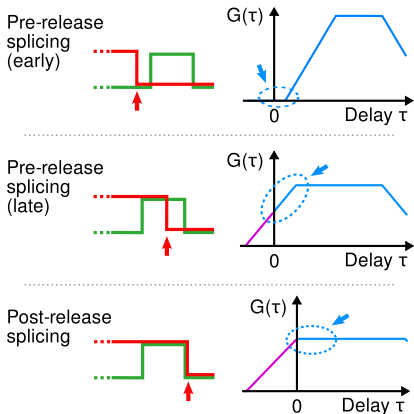

**d Stochastic kinetics  
(with real construct)**

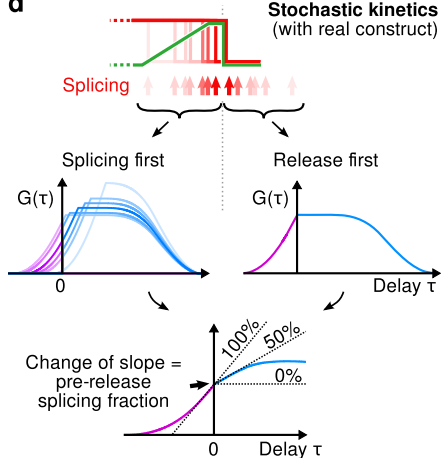

Supplement: supp [file elife-03939-supp-v1.zip]
