# Supplementary material for: Kinetic competition during the transcription cycle results in stochastic RNA processing
Source: eLife journal article supplement (doi:10.7554/elife.03939), 2014-10-01
Supplement: supp [file elife-03939-supp-v1.zip › elife_poa_e03939_Supplementary_File_2.xlsx]

## Sheet: Sheet1
Scheme I – No co-transcriptional splicing												Features of Grg(0)			Unspliced RNA can be released
												Non-null	Positive slope	Change of slope
	Model	Description	Time distributions						Params	# of params
			A(t)	B(t)		D(t)	E(t)	-
	I.1	No splicing, constant elongation	δA	δB*δC		δD	δE	-	v	1		✓	✗	✓	✓
	I.2	No splicing, pause after 3'ss	δA	δB*δC*e(ps)		δD	δE	-	v, ps	2		✓	✗	✓	✓
	I.3	No splicing, pause at 3' end of gene	δA	δB*δC		δD	δE*e(pt)	-	v, pt	2		✓	✗	✓	✓
	I.4	No splicing, pause after 3'ss and at 3' end of gene	δA	δB*δC*e(ps)		δD	δE*e(pt)	-	v, ps, pt	3		✓	✗	✓	✓
Scheme II – No checkpoint: Transcription and splicing are independent
	Model	Description	Time distributions						Params	# of params
			A(t)	B(t)	C(t)	D(t)	E(t)	F(t)
	II.1	Constant elongation, splicing (deterministic)	δA	δB	δC	δD	δE	δ(t-s)	v, s	2		✓	✓	✗	✓
	II.2	Constant elongation, splicing (stochastic, exp.)	δA	δB	δC	δD	δE	e(s)	v, s	2		✓	✓	✓	✓
	II.3	Splicing (det.), pause after 3'ss	δA	δB	e(ps)*δC	δD	δE	δ(t-s)	v, s, ps	3		✓	✓	✓	✓
	II.4	Splicing (det.), pause at 3' end of gene	δA	δB	δC	δD	δE*e(pt)	δ(t-s)	v, s, pt	3		✓	✓	✓	✓
	II.5	Splicing (det.), pause after 3'ss and at 3' end	δA	δB	e(ps)*δC	δD	δE*e(pt)	δ(t-s)	v, s, ps, pt	4		✓	✓	✓	✓
	II.6	Splicing (exp.), pause at 3' end of gene (det.)	δA	δB	δC	δD	δE*δ(t-pt)	e(s)	v, s, pt	3		✓	✓	✓	✓
	II.7	Splicing (exp.), pause at 3' end of gene (exp.)	δA	δB	δC	δD	δE*e(pt)	e(s)	v, s, pt	3		✓	✓	✓	✓
	II.8	Splicing (gamma), pause at 3' end of gene (exp.) Generalizes models II.4 (ns=∞) and II.7 (ns=1)	δA	δB	δC	δD	δE*e(pt)	g(s,ns)	v, s, ns, pt	4		✓	✓	✓	✓
Scheme III – Checkpoint at 3'ss: Elongation pauses at the 3'ss until intron is spliced
	Model	Description	Time distributions						Params	# of params
			A(t)	B(t)	C(t)	D(t)	E(t)	F(t)
	III.1	Elongation pauses after 3'ss until splicing completes (exp.)	δA	δB	δC	δD	δE	e(s)	v, s	2		✗	✗	✗	✗
	III.2	Elongation pauses after 3'ss until splicing completes (det.)	δA	δB	δC	δD	δE	δ(t-s)	v, s	2		✗	✗	✗	✗
Scheme IV – Checkpoint at exon 3' end/termination site: Splicing can only happen after end of next exon is reached
	Model	Description	Time distributions						Params	# of params
			A(t)	B(t)		D(t)	E(t)	F(t)
	IV.1	When 3' end of gene is reached: splicing is immediate, release occurs after a pause	δA	δB*δC		δD	δE	e(pt)	v, pt	2		✓	✓	✗	✗
	IV.2	When 3' end of gene is reached: splicing is stochastic (exp.), then release occurs after a pause	δA	δB*δC		δD	δE*e(s)	e(pt)	v, s, pt	3		✓	✓	✗	✗
	IV.3	When 3' end is reached: splicing is stochastic (gamma), then release occurs after a pause	δA	δB*δC		δD	δE*g(ns,s)	e(pt)	v, s, ns, pt	4		✓	✓	✗	✗
	IV.4	When 3' end is reached: splicing is stochastic (exp.), then release is immediate for a fraction α of transcripts or occurs after a pause for the rest	δA	δB*δC		δD	δE*e(s)	α δ(t)+ (1-α)e(pt)	v, s, α, pt	4		✓	✓	✓	✗
Scheme V – Checkpoint for release: Transcript is retained at 3' end until splicing completes
	Model	Description	Time distributions						Params	# of params
			A(t)	B(t)	C(t)	D(t)	E(t)	F(t)
	V.1	Constant elongation, splicing (det.), release can only occur once splicing is completed	δA	δB	δC	δD	δE	δ(t-s)	v, s	2		✓	✓	✓	✗
	V.2	Constant elongation, splicing (exp.), release can only occur once splicing is completed	δA	δB	δC	δD	δE	e(s)	v, s	2		✓	✓	✓	✗
	V.3	Constant elongation, splicing (gamma), release can only occur once splicing is completed	δA	δB	δC	δD	δE	g(s,ns)	v, s, ns	3		✓	✓	✓	✗
Parameters					Notation
v	Elongation rate				Deterministic delays (elongation through each region of the construct):
s	Splicing time (release of lariat), from transcription of 3'ss (schemes				δA = δ(t-1447/v), δB = δ(t-405/v), δC = δ(t-797/v), δD = δ(t-1296/v) and δE = δ(t-260/v)
	II,III,V) or from when RNAP is at gene 3' end (scheme IV)				Exponential distribution: e(x) = exp(-t/x)/x
ns	Number of steps in the splicing reaction				Gamma distribution: g(x,n) = (nt/x)nexp(-nt/x)/((n-1)!t)
ps, pt	Pausing times after 3'ss and at termination site/3' end of gene
