# Supplementary figures and images for: Kinetic competition during the transcription cycle results in stochastic RNA processing
Source: eLife journal article supplement (doi:10.7554/elife.03939), 2014-10-01

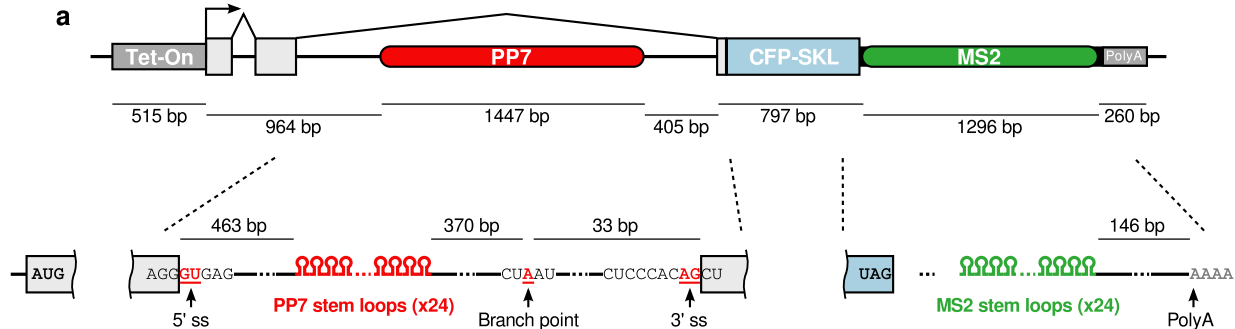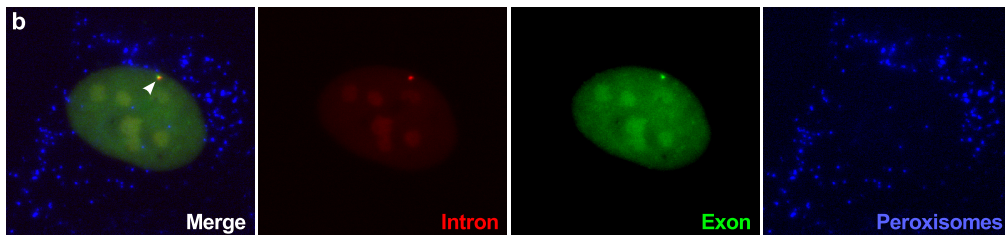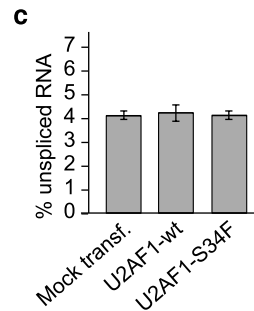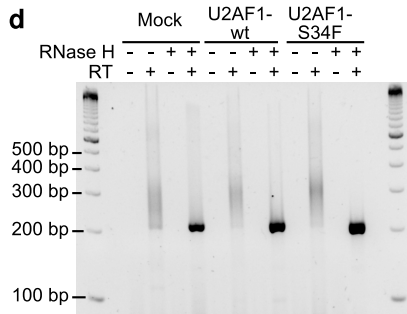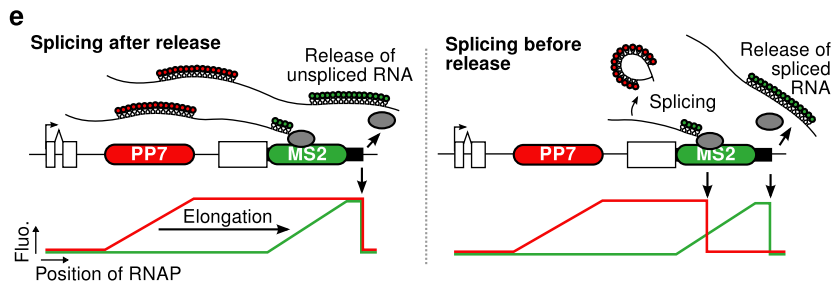

Supplement: supp [file elife-03939-supp-v1.zip]

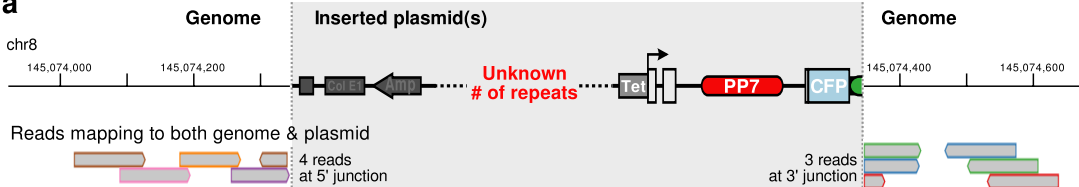

**b**

| Genome |          |             |             |   | Plasmid |                 |
|--------|----------|-------------|-------------|---|---------|-----------------|
| Chrom. | 5' junc. | 3' junc.    | Strand      |   |         |                 |
| 1      | chr8     | 145,074,337 | 145,074,349 | + |         | ↑ 3' ↑ 5' junc. |
| 2      | chr21    | ?           | 43,785,472  | - |         | ↑ 3' junction   |
| 3      | chr3     | ?           | 121,140,689 | - |         | ↑ 3' junction   |

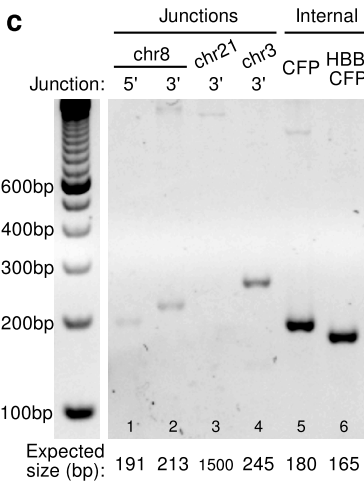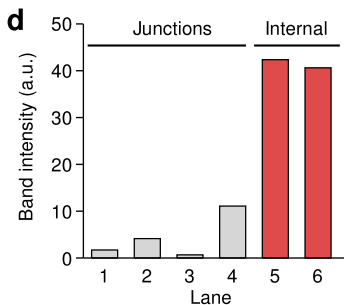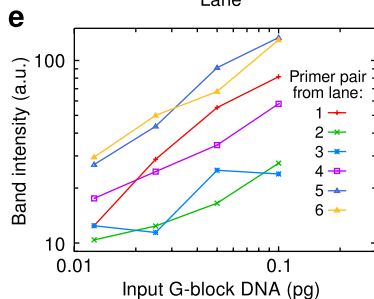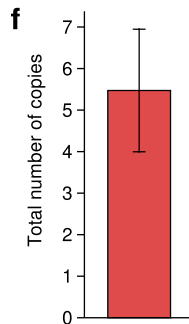

Supplement: supp [file elife-03939-supp-v1.zip]

## Experimental data

**a**

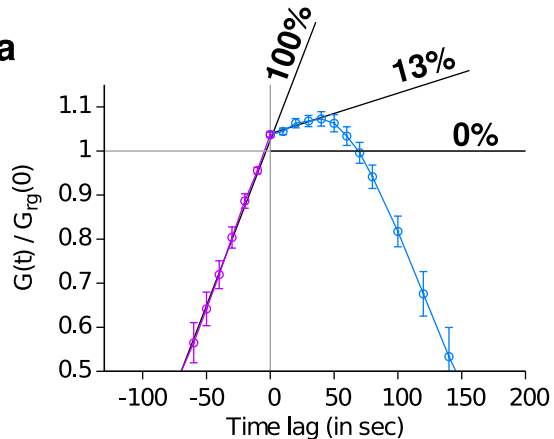

**b**

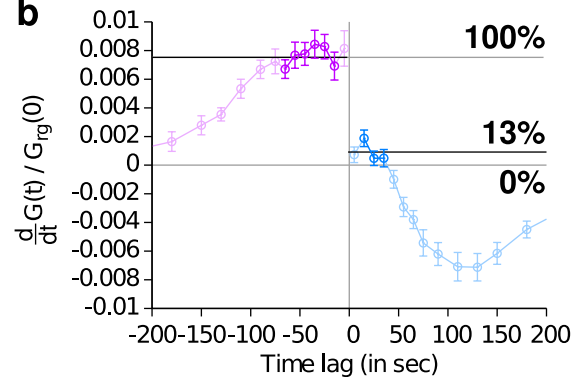

## Simulated data

**c**

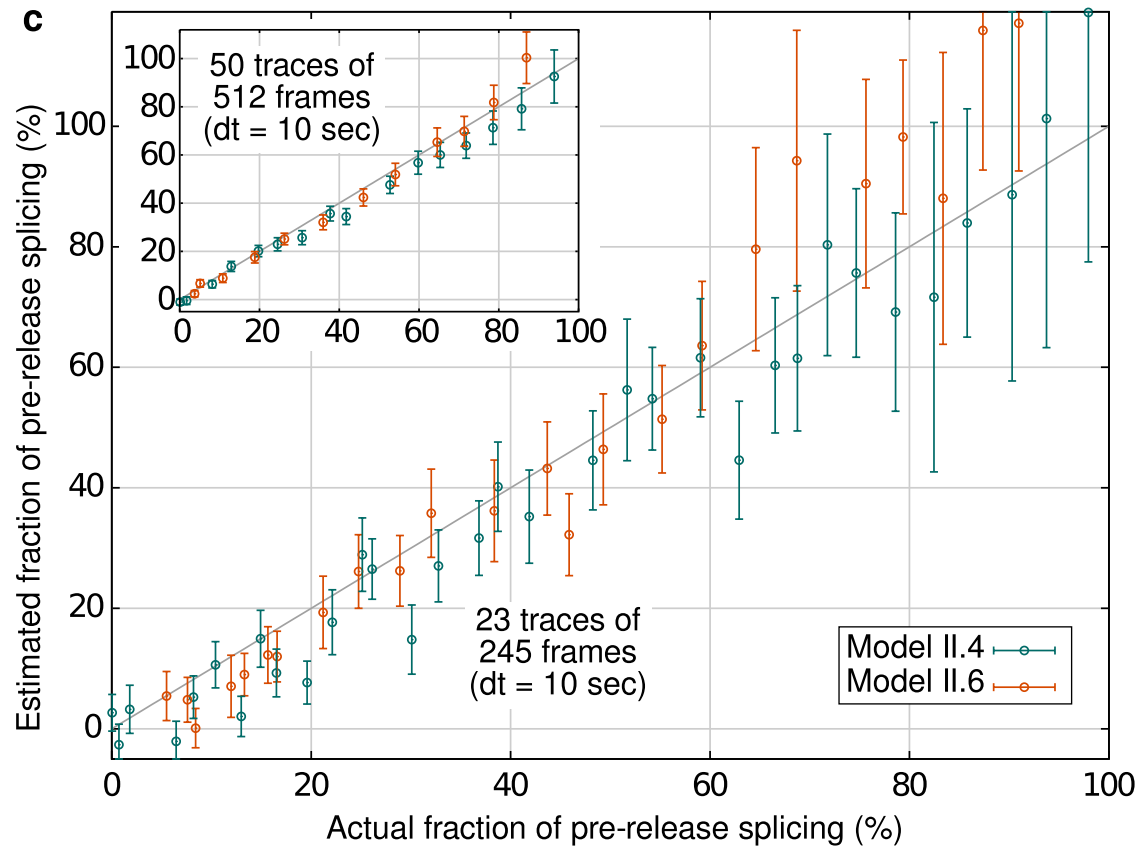

Supplement: supp [file elife-03939-supp-v1.zip]

**b**

**c**

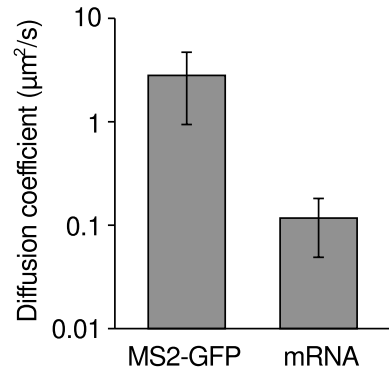

Supplement: supp [file elife-03939-supp-v1.zip]

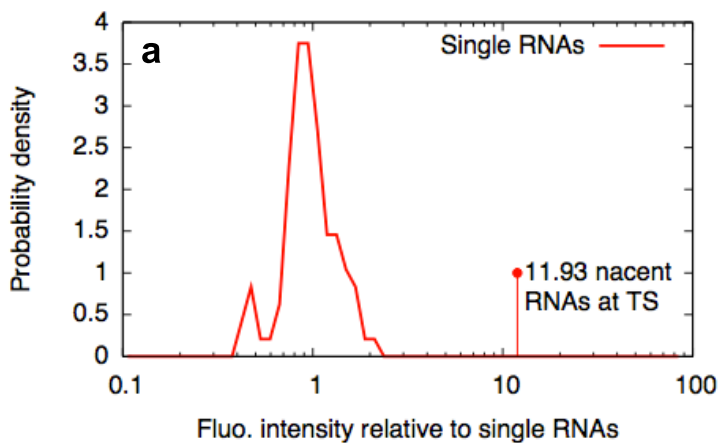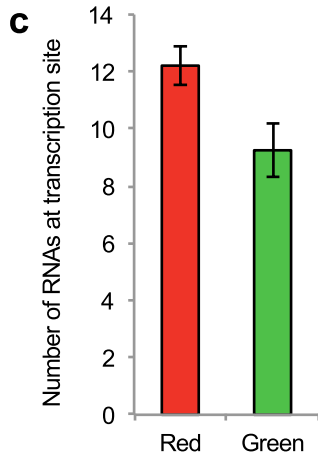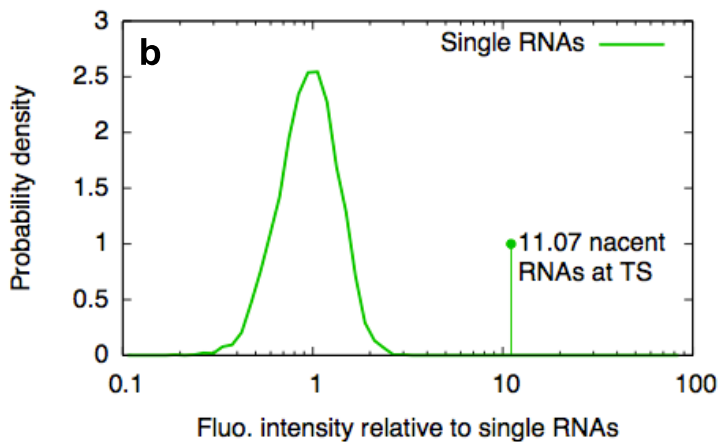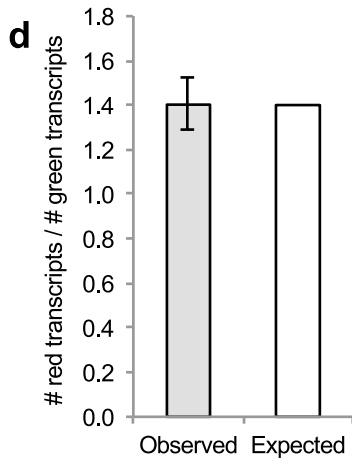

Supplement: supp [file elife-03939-supp-v1.zip]

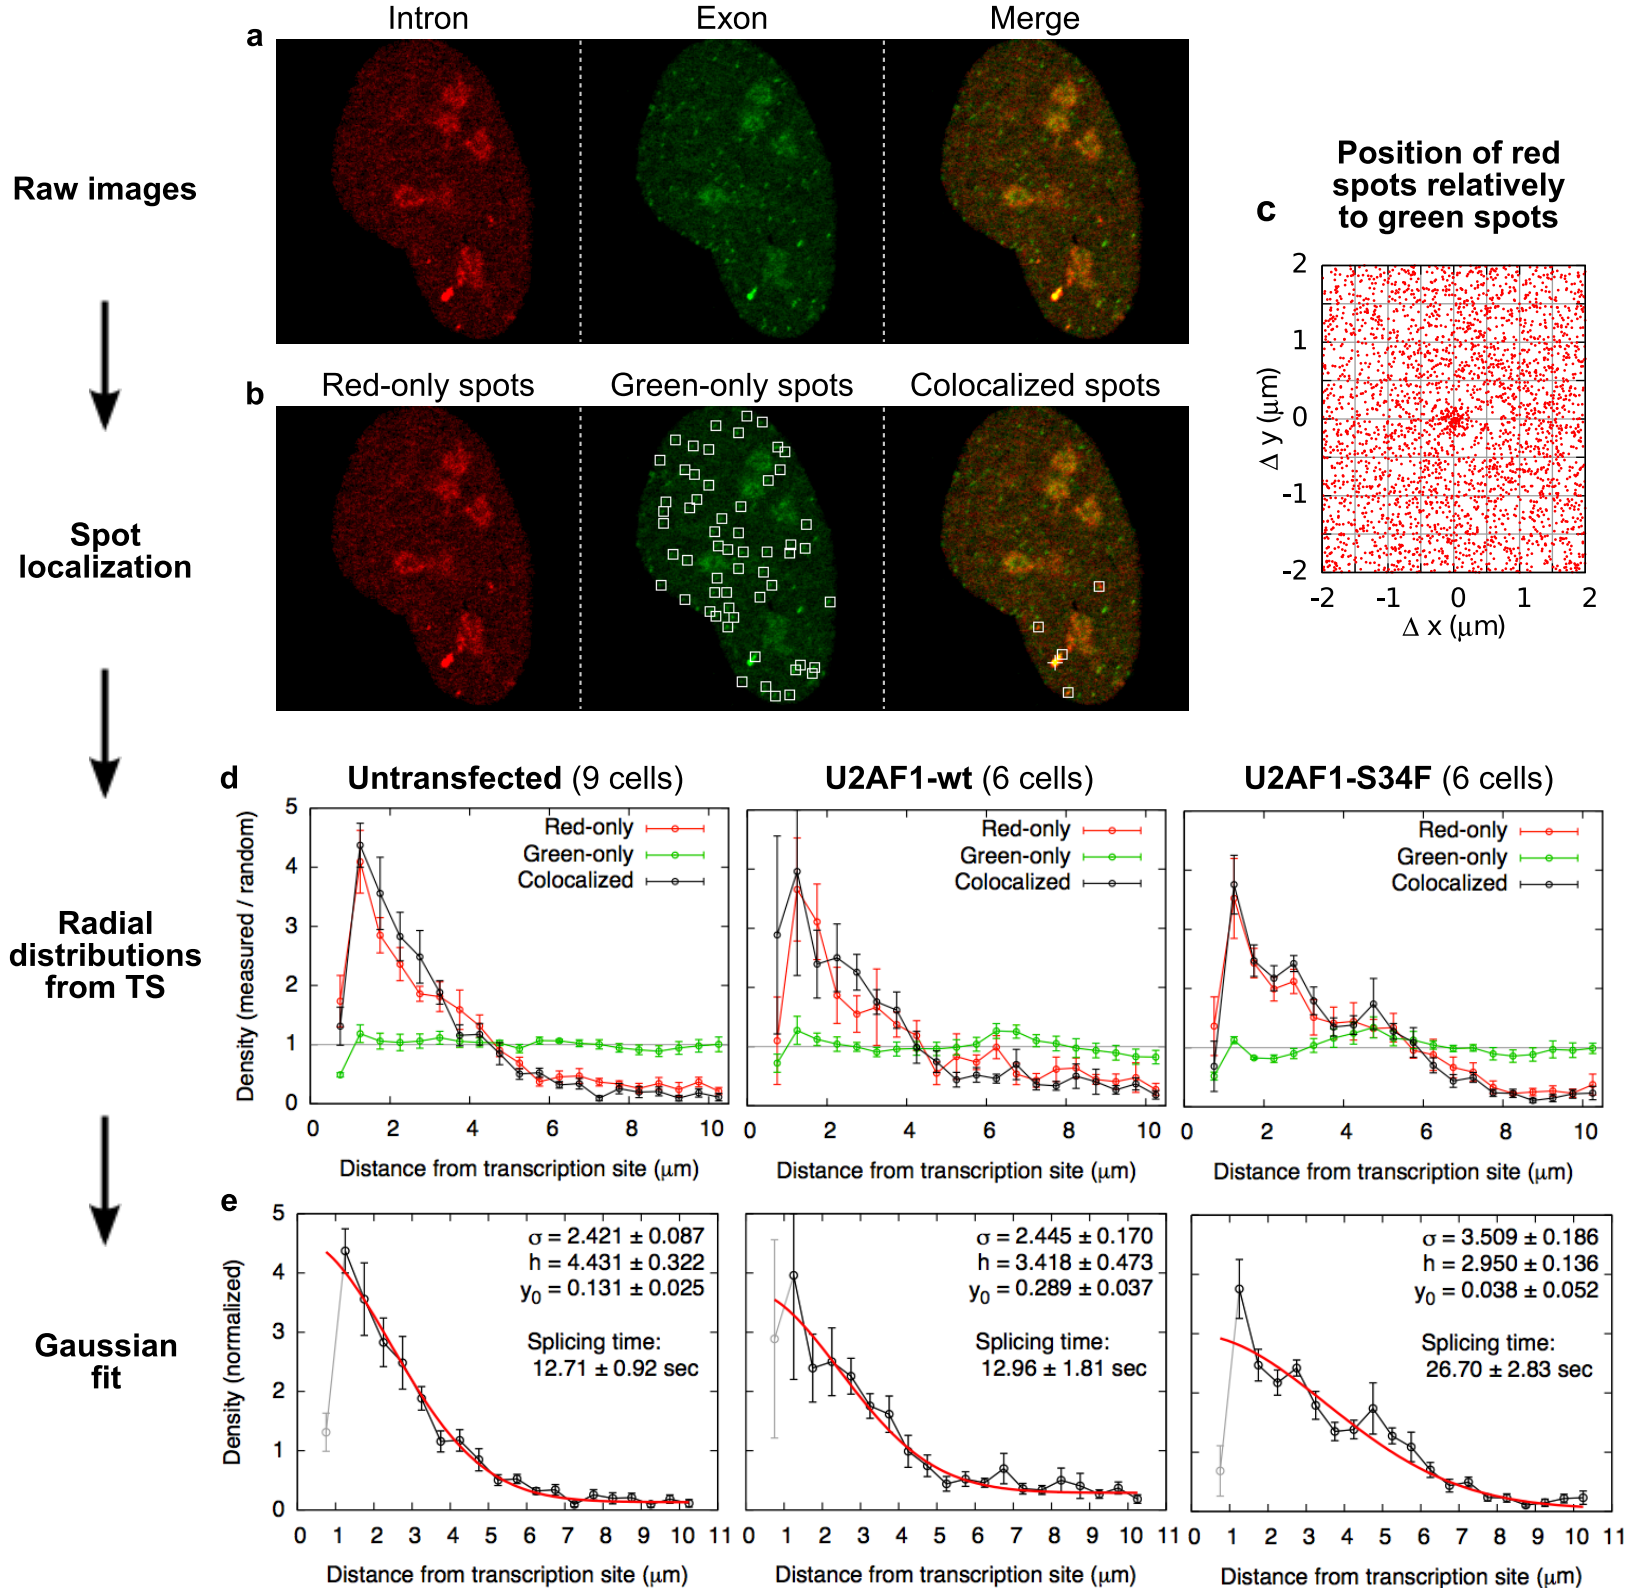

Supplement: supp [file elife-03939-supp-v1.zip › elife_poa_e03939_Figure_4_Supplement_1.pdf]

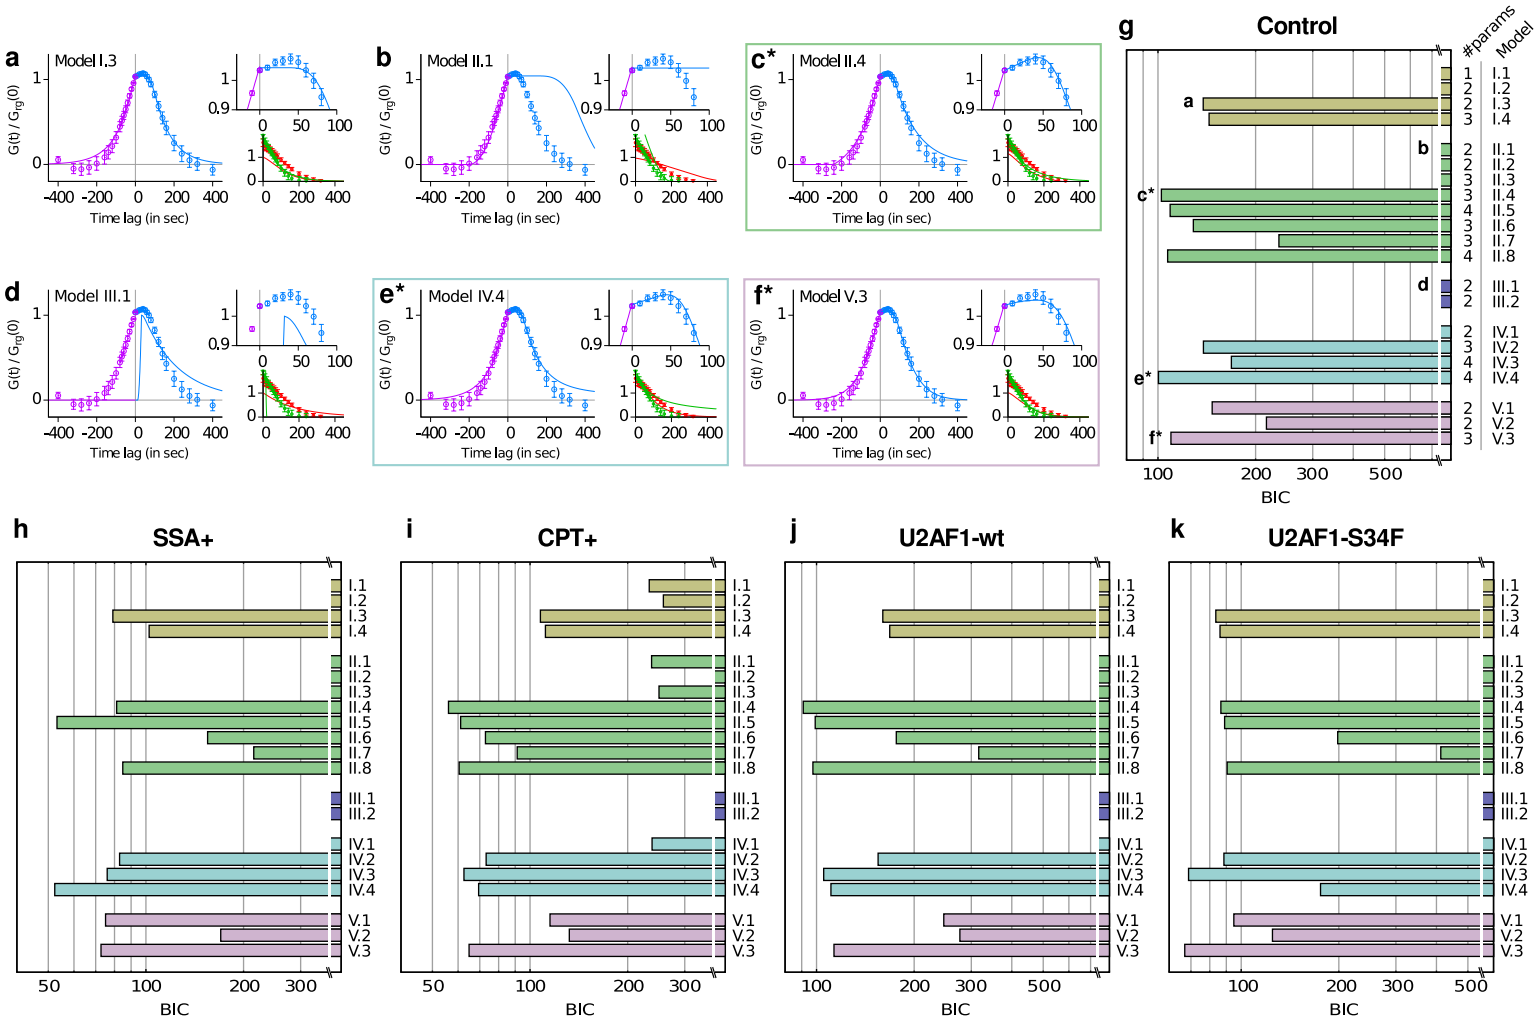

Supplement: supp [file elife-03939-supp-v1.zip › elife_poa_e03939_Figure_2_Supplement_5.pdf]

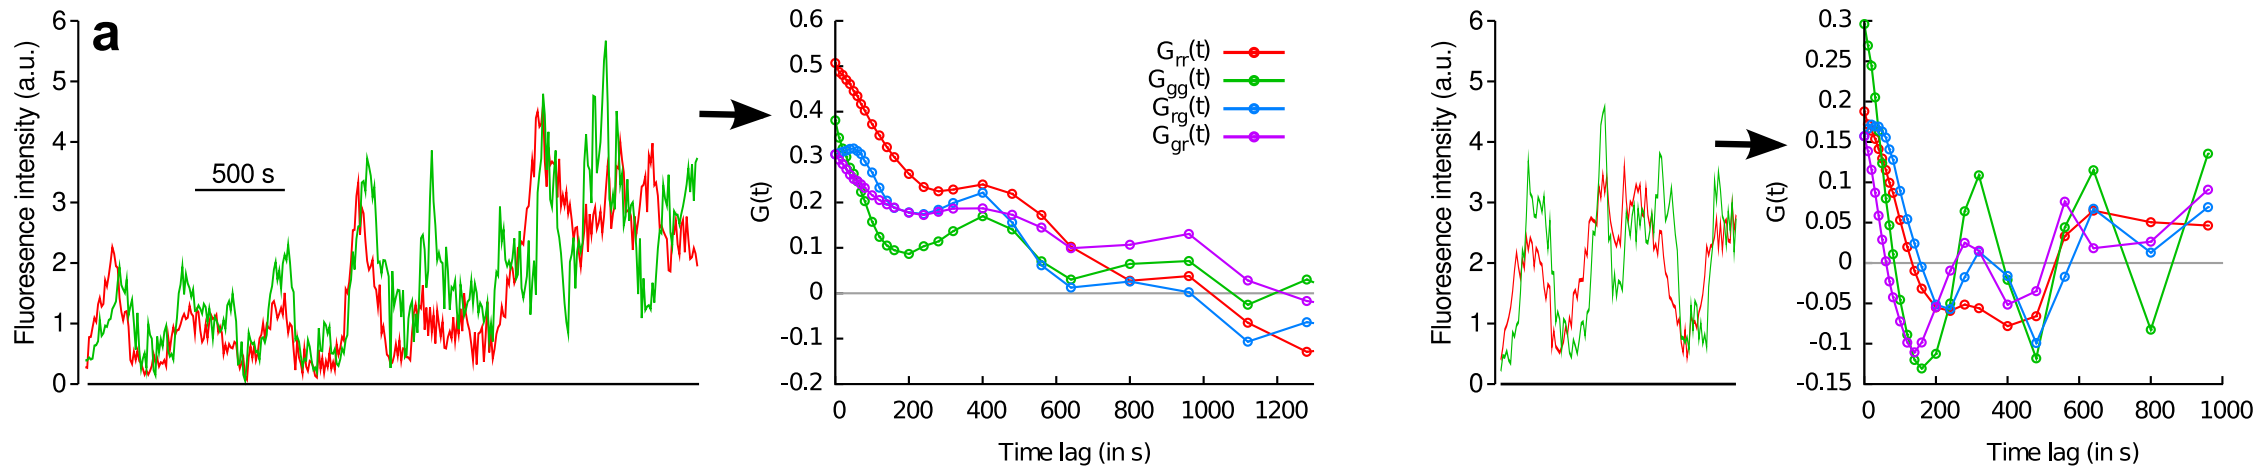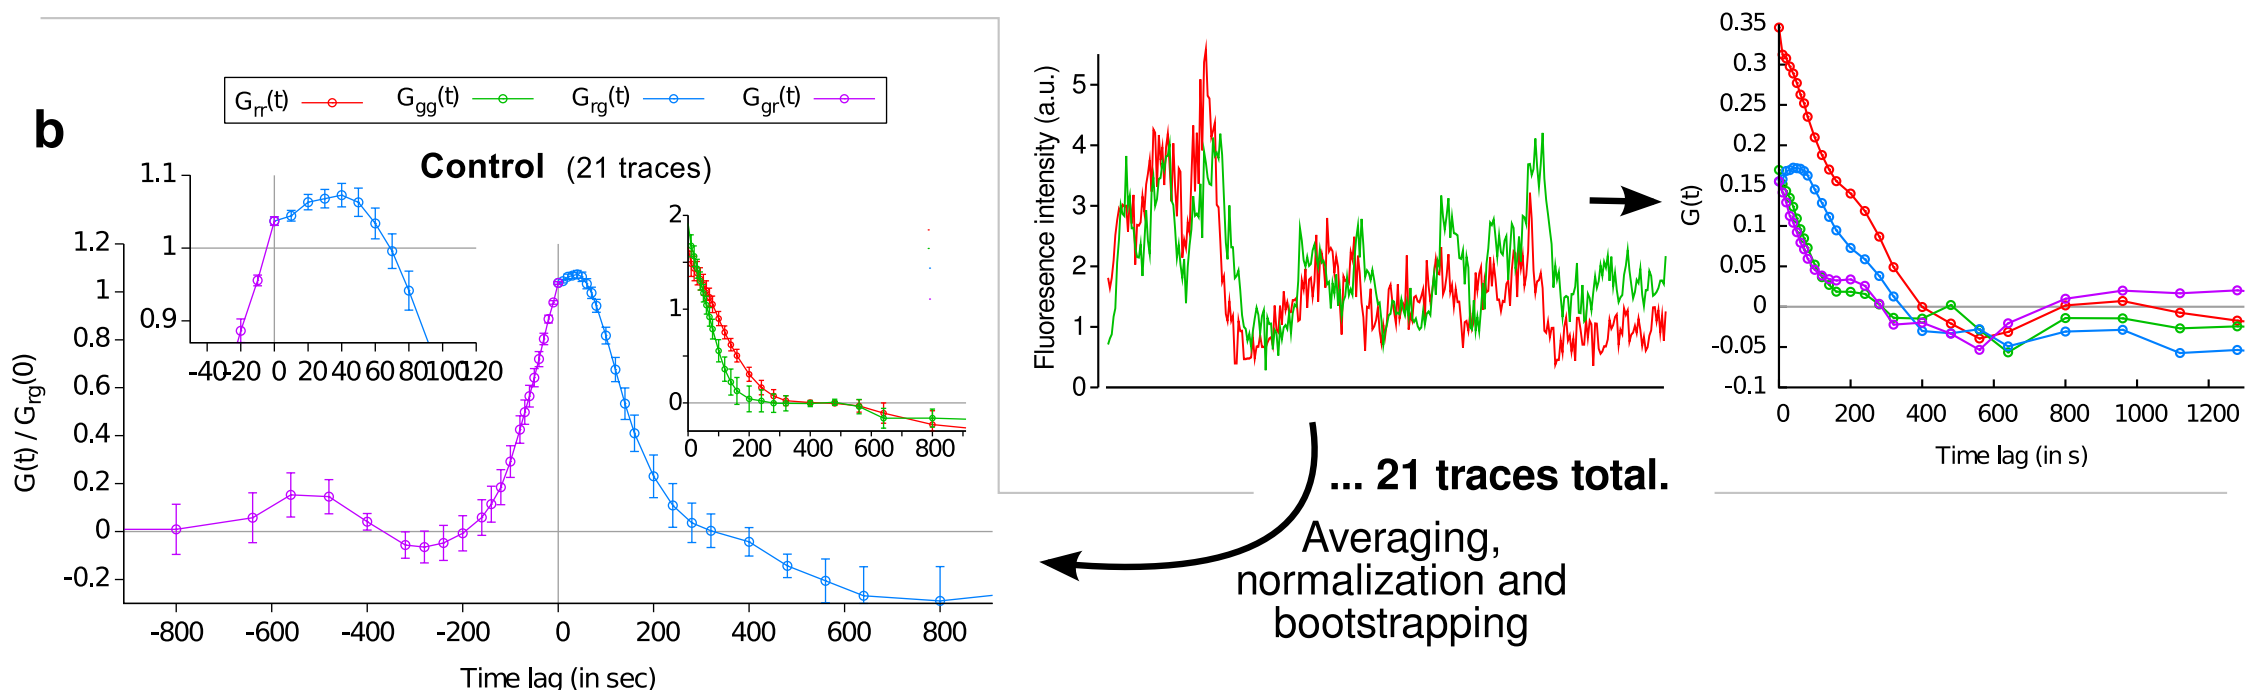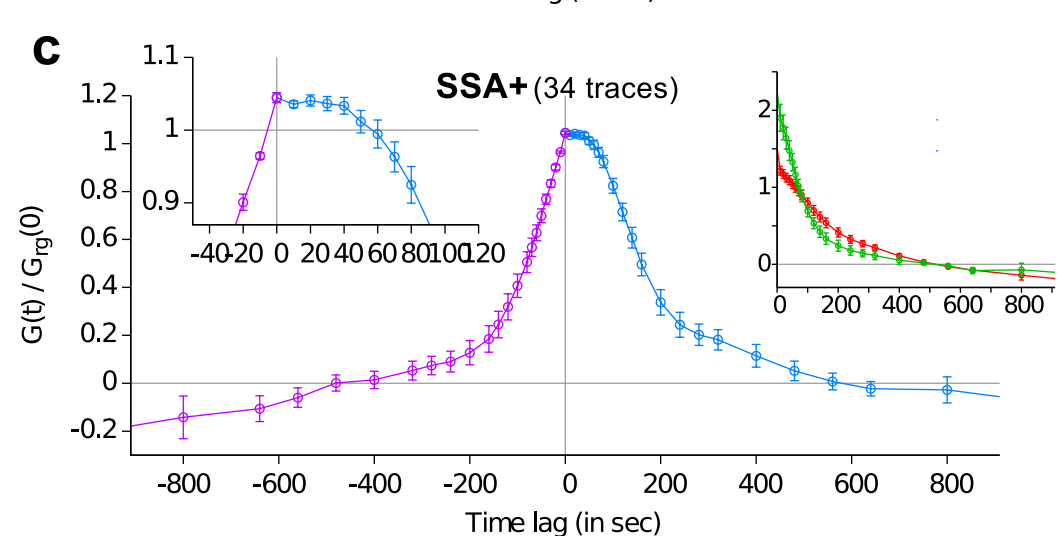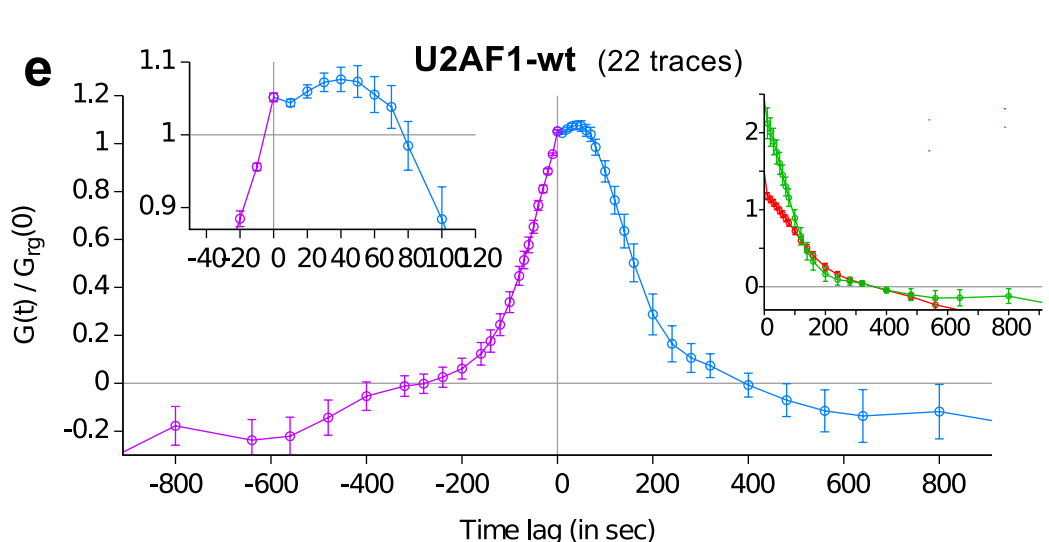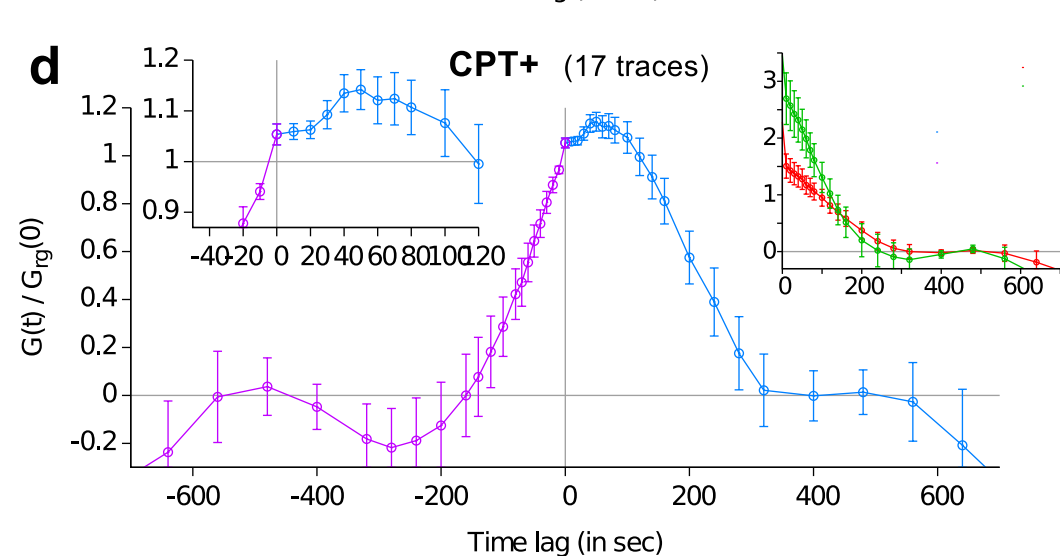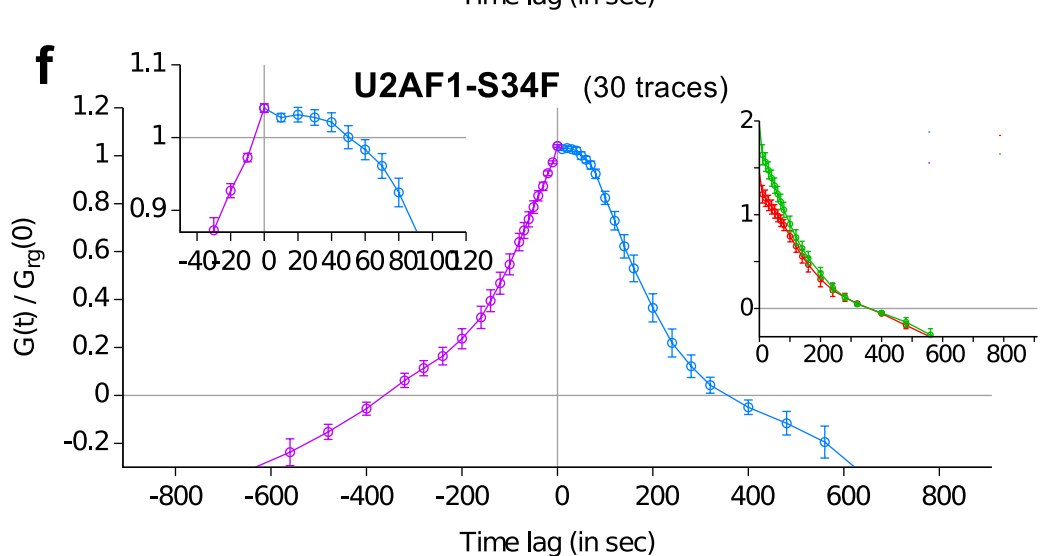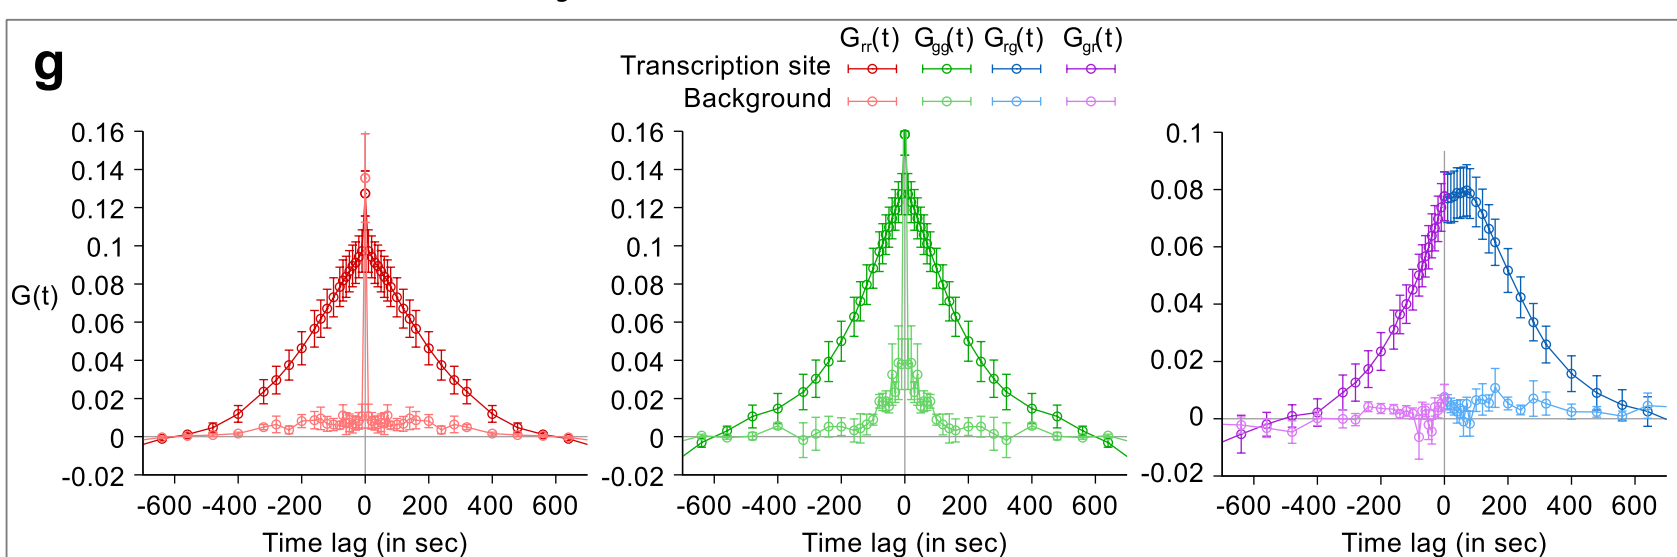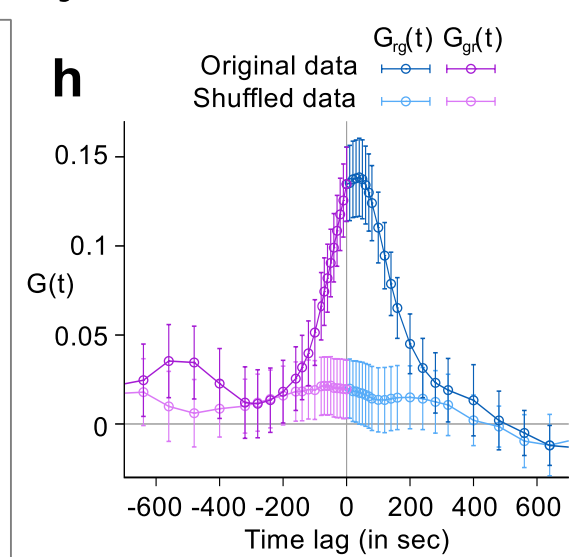

Supplement: supp [file elife-03939-supp-v1.zip › elife_poa_e03939_Figure_2_Supplement_1.pdf]
